# Supplementary material for: Dicarboxamide polymorph derivatives for trace-level electrochemical sensing of Cu(ii) supported with crystal structure and theoretical studies
Source: Royal Society of Chemistry journal article supplement (doi:10.1039/c8ay01967c), 2018-01-01
Supplement: c8ay01967c1.pdf [file c8ay01967c1.pdf]

## Supplementary information

### Dicarboxamide polymorph derivative for trace level electrochemical sensing of Cu(II) supported with crystal structure and theoretical studies

Love Karan Rana,<sup>§</sup> Rashmi Sharma,<sup>&</sup> Bilal Ahmed<sup>§</sup>, Damanjeet Kaur<sup>§</sup>, Sanjeev  
Kumar<sup>#</sup>, Geeta Hundal,<sup>§,\*</sup> Susheel K Mittal<sup># \*</sup>

<sup>§</sup>Department of Chemistry, UGC sponsored centre of advance studies-I, Guru Nanak Dev  
University, Amritsar-143005, Punjab, India.

<sup>#</sup> School of Chemistry & Biochemistry, Thapar Institute of Engineering & Technology,  
Patiala—147004, Punjab, India

<sup>&</sup> Sri Guru Granth Sahib World University, Chemistry Department, Fatehgarh Sahib,  
(PUNJAB).

[lovekaranrana@yahoo.com](mailto:lovekaranrana@yahoo.com) ; [geetahundal@yahoo.com](mailto:geetahundal@yahoo.com)

#### Table of Contents

1. IR spectra of L3 (Fig.S1).....
2. <sup>1</sup>H-NMR spectra of L3 (Fig.S2).....
3. Mass spectra of L3 (Fig. S3).....
4. Showing the hydrogen bonded network of L3 (Fig.S4).....
5. Table S1 showing various C-H···O/N H-bonding interactions in L3.....
6. Table S2 : Optimised geometry of Cu(II)-L3 complex at B3LYP-D3/6-31+G(d)-  
LACVP\*\*.....
7. Table S3 : Optimised geometry of L3 at B3LYP-D3/6-31+G(d).....



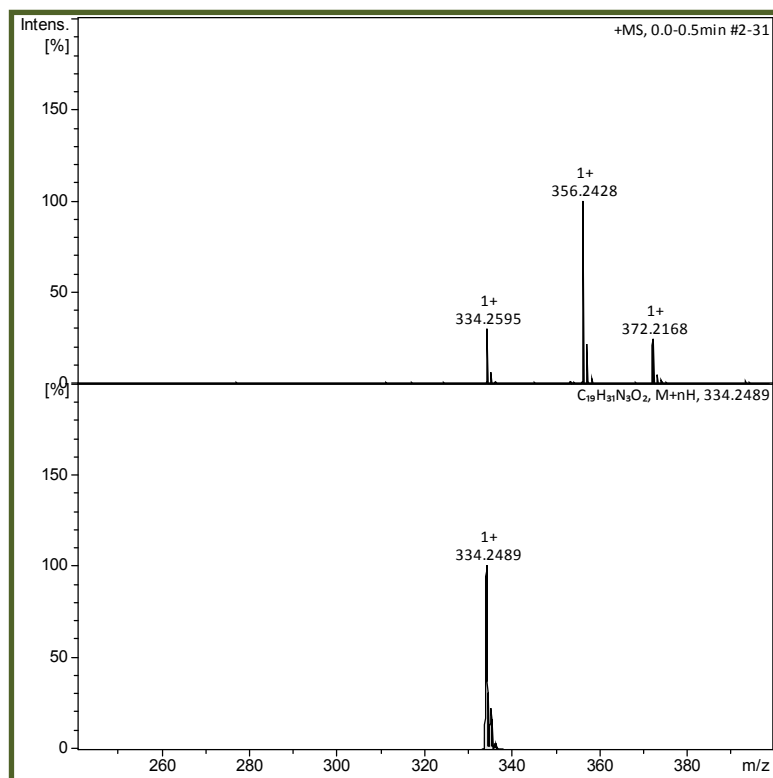

**Fig.S3** Mass spectrum of L3.

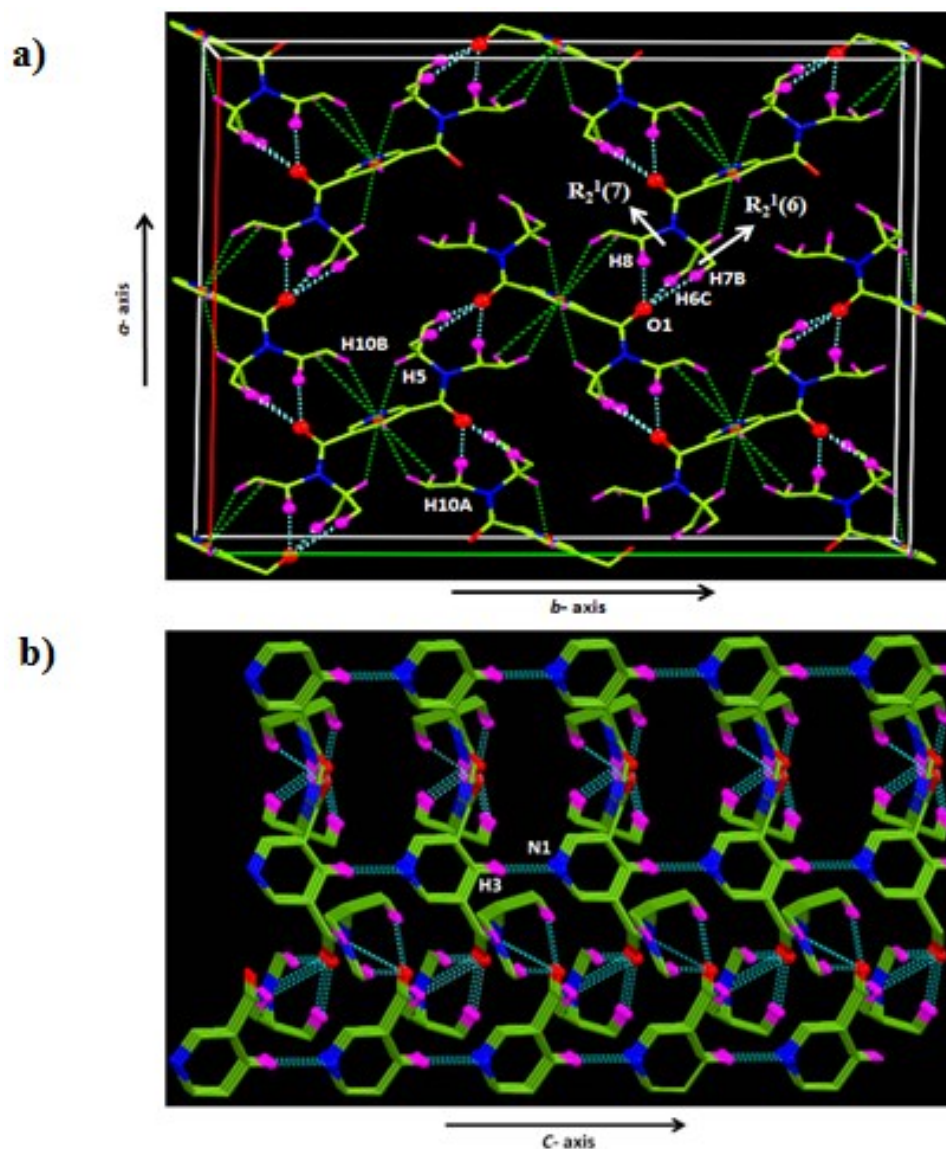

**Fig.S4a** Showing 2D hydrogen bonded sheet of **L3** running parallel to *ab* plane, **b)** shows how these sheets are connected along *c* axis.

**Table S1:** Showing various C-H $\cdots$ O/N H-bonding interactions in **L3**.

| D—H $\cdots$ A                    | A $\cdots$ H/ Å | A $\cdots$ D/ Å | A $\cdots$ H—D/ deg |
|-----------------------------------|-----------------|-----------------|---------------------|
| C9-H9B $\cdots$ O1                | 2.422(2)        | 2.981(3)        | 115.8               |
| C10-H10C $\cdots$ O1              | 2.453(1)        | 3.008(3)        | 115.5               |
| C3-H3 $\cdots$ N1 <sup>i</sup>    | 2.442(3)        | 3.392(4)        | 180                 |
| C3-H3 $\cdots$ N1 <sup>ii</sup>   | 2.442(3)        | 3.392(4)        | 180                 |
| C8-H8 $\cdots$ O1 <sup>iii</sup>  | 2.297(1)        | 3.253(2)        | 159.7               |
| C6-H6C $\cdots$ O1 <sup>iii</sup> | 2.835(2)        | 3.683(3)        | 145.2               |
| C7-H7B $\cdots$ O1 <sup>iii</sup> | 2.546(1)        | 3.467(2)        | 156.5               |

**Symmetry code :** i:  $x, y, z-1$ , ii:  $-x+1, -y, z-1$ , iii:  $x+1/4, -y-1/4, z-1/4$ .

**Table S2 : Optimised geometry of Cu(II)-L3 complex at B3LYP-D3/6-31+G(d)-LACVP\*\***

|   |               |               |               |
|---|---------------|---------------|---------------|
| C | -1.0210340843 | 2.0589718253  | -0.3059443531 |
| H | -1.8730378257 | 2.6716292848  | -0.5781430383 |
| C | -1.1347847704 | 0.6681632493  | -0.2809913304 |
| C | 0.0062685478  | -0.0872277285 | 0.0006612911  |
| H | -0.0424923443 | -1.1706268245 | 0.0023852370  |
| C | -2.4441270487 | 0.0802568486  | -0.7646536902 |
| C | -2.6678544213 | -1.3475272831 | 1.2932300070  |
| H | -1.9027248050 | -0.6370547750 | 1.6096634313  |
| C | -3.8840096900 | -1.1548719721 | 2.2201556915  |
| H | -4.2755810108 | -0.1370761028 | 2.1498215032  |
| H | -3.5624488674 | -1.3318257929 | 3.2502037533  |
| H | -4.6882386365 | -1.8592827050 | 1.9960032156  |
| C | -2.0907460674 | -2.7726676105 | 1.3890925539  |
| H | -1.2464199245 | -2.9186880323 | 0.7080226165  |
| H | -2.8427074357 | -3.5321538967 | 1.1611627189  |
| H | -1.7456654919 | -2.9428172235 | 2.4126056137  |
| C | -4.1131043339 | -1.7526336563 | -0.7714442343 |
| H | -4.3278124697 | -2.5781024593 | -0.0910745185 |
| C | -3.6457532062 | -2.3435720981 | -2.1132881947 |
| H | -2.7374087323 | -2.9396578817 | -1.9841020464 |
| H | -3.4693233215 | -1.5633616882 | -2.8545422810 |
| H | -4.4329733620 | -3.0033546816 | -2.4874694963 |
| C | -5.3978054059 | -0.9055633111 | -0.9115356357 |
| H | -5.6999090603 | -0.4816782314 | 0.0488271495  |
| H | -6.1964026014 | -1.5665189144 | -1.2595890479 |
| H | -5.2592598682 | -0.1035881368 | -1.6358377449 |
| N | 0.1344090830  | 2.6914470204  | -0.0046964577 |
| N | -3.0115483518 | -1.0014319341 | -0.1070841432 |

|    |               |               |               |
|----|---------------|---------------|---------------|
| O  | -2.9460916463 | 0.5820584077  | -1.7633482377 |
| C  | 1.2268622766  | 1.9567237722  | 0.3001173854  |
| H  | 2.1310428155  | 2.4899289769  | 0.5709370131  |
| C  | 1.2116359994  | 0.5618321381  | 0.2802931464  |
| C  | 2.4575156705  | -0.1460241867 | 0.7700352778  |
| C  | 2.5626117706  | -1.5774483220 | -1.2940099599 |
| H  | 1.8733178322  | -0.7935715340 | -1.6128320778 |
| C  | 3.8035297989  | -1.4965315368 | -2.2048285035 |
| H  | 4.2896732653  | -0.5213756127 | -2.1227786898 |
| H  | 3.4799623851  | -1.6362690244 | -3.2399420155 |
| H  | 4.5337780690  | -2.2758154622 | -1.9753663800 |
| C  | 1.8523302926  | -2.9401797213 | -1.4095182398 |
| H  | 0.9890479622  | -3.0103904603 | -0.7404096745 |
| H  | 2.5247904244  | -3.7704433827 | -1.1802641241 |
| H  | 1.5053266309  | -3.0681550454 | -2.4385282760 |
| C  | 3.9362952338  | -2.1363088073 | 0.7845381735  |
| H  | 4.0743347778  | -2.9773225052 | 0.1035210448  |
| C  | 3.3970266687  | -2.6795998768 | 2.1196058096  |
| H  | 2.4350335363  | -3.1814376693 | 1.9787242253  |
| H  | 3.2913589961  | -1.8869804738 | 2.8612544025  |
| H  | 4.1098095962  | -3.4156160887 | 2.5007459783  |
| C  | 5.2982493079  | -1.4236618965 | 0.9417927810  |
| H  | 5.6516202404  | -1.0294614765 | -0.0135885809 |
| H  | 6.0222355602  | -2.1630270633 | 1.2952484751  |
| H  | 5.2336518954  | -0.6141129539 | 1.6679065613  |
| N  | 2.9229292436  | -1.2758124995 | 0.1123993580  |
| O  | 2.9993869980  | 0.3035411883  | 1.7723167934  |
| Cu | 0.2251606745  | 4.6486522881  | -0.0177082555 |

**Table S3 : Optimised geometry of L3 at B3LYP-D3/6-31+G(d)**

|   |               |               |               |
|---|---------------|---------------|---------------|
| C | -1.0210340843 | 2.0589718253  | -0.3059443531 |
| H | -1.8730378257 | 2.6716292848  | -0.5781430383 |
| C | -1.1347847704 | 0.6681632493  | -0.2809913304 |
| C | 0.0062685478  | -0.0872277285 | 0.0006612911  |
| H | -0.0424923443 | -1.1706268245 | 0.0023852370  |
| C | -2.4441270487 | 0.0802568486  | -0.7646536902 |
| C | -2.6678544213 | -1.3475272831 | 1.2932300070  |
| H | -1.9027248050 | -0.6370547750 | 1.6096634313  |
| C | -3.8840096900 | -1.1548719721 | 2.2201556915  |
| H | -4.2755810108 | -0.1370761028 | 2.1498215032  |
| H | -3.5624488674 | -1.3318257929 | 3.2502037533  |
| H | -4.6882386365 | -1.8592827050 | 1.9960032156  |
| C | -2.0907460674 | -2.7726676105 | 1.3890925539  |
| H | -1.2464199245 | -2.9186880323 | 0.7080226165  |
| H | -2.8427074357 | -3.5321538967 | 1.1611627189  |
| H | -1.7456654919 | -2.9428172235 | 2.4126056137  |
| C | -4.1131043339 | -1.7526336563 | -0.7714442343 |
| H | -4.3278124697 | -2.5781024593 | -0.0910745185 |
| C | -3.6457532062 | -2.3435720981 | -2.1132881947 |
| H | -2.7374087323 | -2.9396578817 | -1.9841020464 |
| H | -3.4693233215 | -1.5633616882 | -2.8545422810 |
| H | -4.4329733620 | -3.0033546816 | -2.4874694963 |
| C | -5.3978054059 | -0.9055633111 | -0.9115356357 |
| H | -5.6999090603 | -0.4816782314 | 0.0488271495  |
| H | -6.1964026014 | -1.5665189144 | -1.2595890479 |
| H | -5.2592598682 | -0.1035881368 | -1.6358377449 |
| N | 0.1344090830  | 2.6914470204  | -0.0046964577 |
| N | -3.0115483518 | -1.0014319341 | -0.1070841432 |
| O | -2.9460916463 | 0.5820584077  | -1.7633482377 |
| C | 1.2268622766  | 1.9567237722  | 0.3001173854  |
| H | 2.1310428155  | 2.4899289769  | 0.5709370131  |

|   |              |               |               |
|---|--------------|---------------|---------------|
| C | 1.2116359994 | 0.5618321381  | 0.2802931464  |
| C | 2.4575156705 | -0.1460241867 | 0.7700352778  |
| C | 2.5626117706 | -1.5774483220 | -1.2940099599 |
| H | 1.8733178322 | -0.7935715340 | -1.6128320778 |
| C | 3.8035297989 | -1.4965315368 | -2.2048285035 |
| H | 4.2896732653 | -0.5213756127 | -2.1227786898 |
| H | 3.4799623851 | -1.6362690244 | -3.2399420155 |
| H | 4.5337780690 | -2.2758154622 | -1.9753663800 |
| C | 1.8523302926 | -2.9401797213 | -1.4095182398 |
| H | 0.9890479622 | -3.0103904603 | -0.7404096745 |
| H | 2.5247904244 | -3.7704433827 | -1.1802641241 |
| H | 1.5053266309 | -3.0681550454 | -2.4385282760 |
| C | 3.9362952338 | -2.1363088073 | 0.7845381735  |
| H | 4.0743347778 | -2.9773225052 | 0.1035210448  |
| C | 3.3970266687 | -2.6795998768 | 2.1196058096  |
| H | 2.4350335363 | -3.1814376693 | 1.9787242253  |
| H | 3.2913589961 | -1.8869804738 | 2.8612544025  |
| H | 4.1098095962 | -3.4156160887 | 2.5007459783  |
| C | 5.2982493079 | -1.4236618965 | 0.9417927810  |
| H | 5.6516202404 | -1.0294614765 | -0.0135885809 |
| H | 6.0222355602 | -2.1630270633 | 1.2952484751  |
| H | 5.2336518954 | -0.6141129539 | 1.6679065613  |
| N | 2.9229292436 | -1.2758124995 | 0.1123993580  |
| O | 2.9993869980 | 0.3035411883  | 1.7723167934  |
